# Supplementary material for: αB-crystallin/HspB5 regulates endothelial–leukocyte interactions by enhancing NF-κB-induced up-regulation of adhesion molecules ICAM-1, VCAM-1 and E-selectin
Source: PubMed Central journal article supplement (PMC3779083; doi:10.1007/s10456-013-9367-4), 2013-08-09
Supplement: 10456_2013_9367_MOESM2_ESM.pdf [file 10456_2013_9367_MOESM2_ESM.pdf]

**$\alpha$ B-Crystallin/HspB5 regulates endothelial-leukocyte interactions  
by enhancing NF- $\kappa$ B-induced up-regulation of adhesion molecules ICAM-1,  
VCAM-1 and E-selectin**

Lothar C. Dieterich<sup>1,4,5</sup>, Hua Huang<sup>1,4</sup>, Sara Massena<sup>2</sup>, Nikola Golenhofen<sup>3</sup>, Mia  
Phillipson<sup>2</sup>, Anna Dimberg<sup>1,\*</sup>

<sup>1</sup> Department of Immunology, Genetics and Pathology, The Rudbeck Laboratory,  
Uppsala University, SE-751 85 Uppsala, Sweden

<sup>2</sup> Department of Medical Cell Biology, Uppsala University, SE-751 23 Uppsala,  
Sweden

<sup>3</sup> Institute of Anatomy and Cell Biology, University of Ulm, Albert-Einstein-Allee 11,  
89081, Ulm, Germany

<sup>4</sup> LCD and HH contributed equally to this manuscript

<sup>5</sup> Current address: Institute of Pharmaceutical Sciences, Swiss Federal Institute of  
Technology (ETH) Zurich, CH-8093 Zurich, Switzerland

\* Corresponding author: Anna Dimberg, Department of Immunology, Genetics and  
Pathology, Rudbeck Laboratory, Uppsala University, SE-751 85 Uppsala, Sweden.  
Phone: +46 18 471 4636 Fax: +46 18 55 89 31 Email: Anna.Dimberg@igp.uu.se

**SUPPLEMENTARY FIGURES S1, S2, S3 AND TABLE S1**

**Fig. S1**

**a**

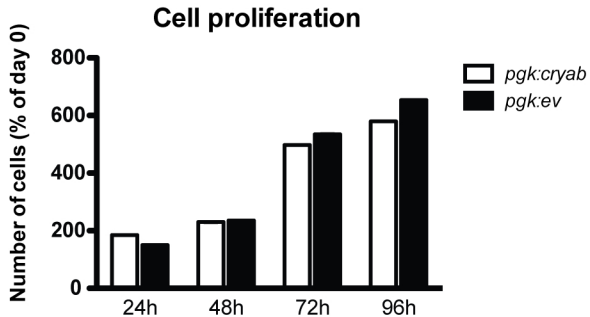

**b**

**Surface ICAM-1**

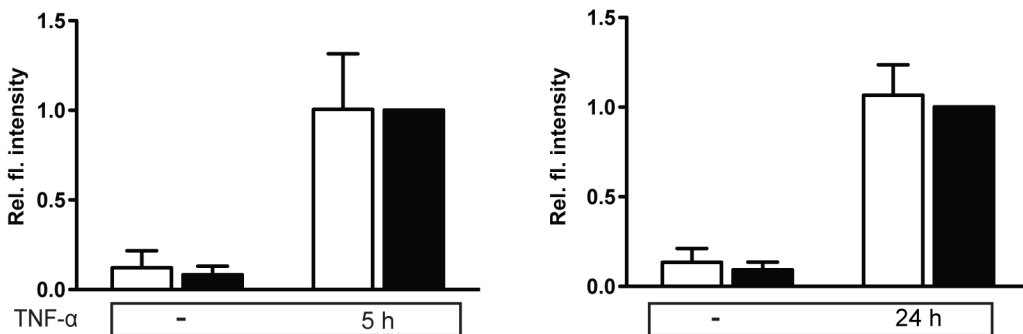

**c**

**Surface VCAM-1**

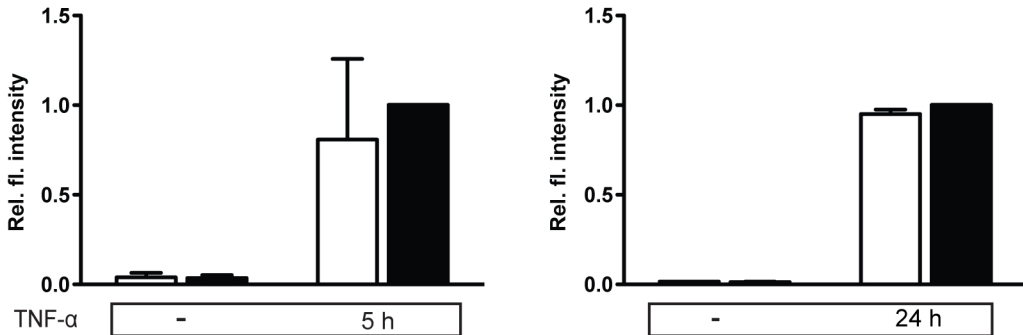

**d**

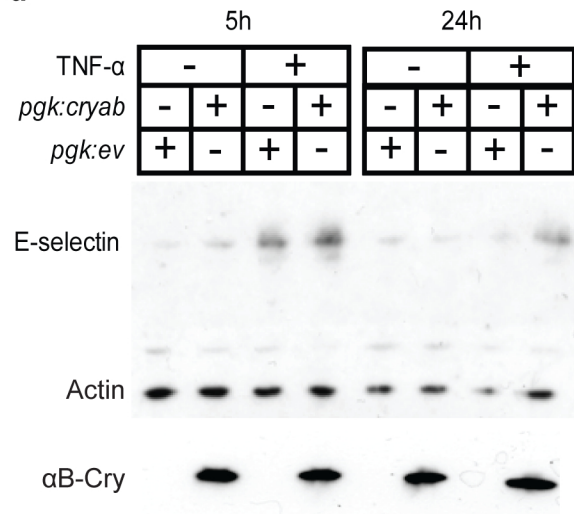

**e**

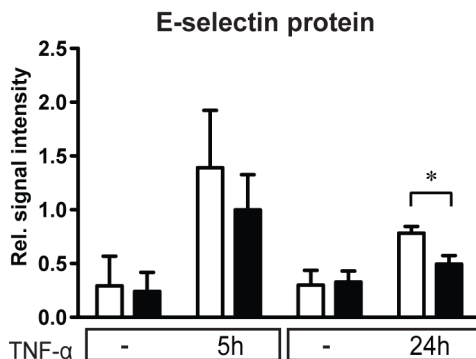

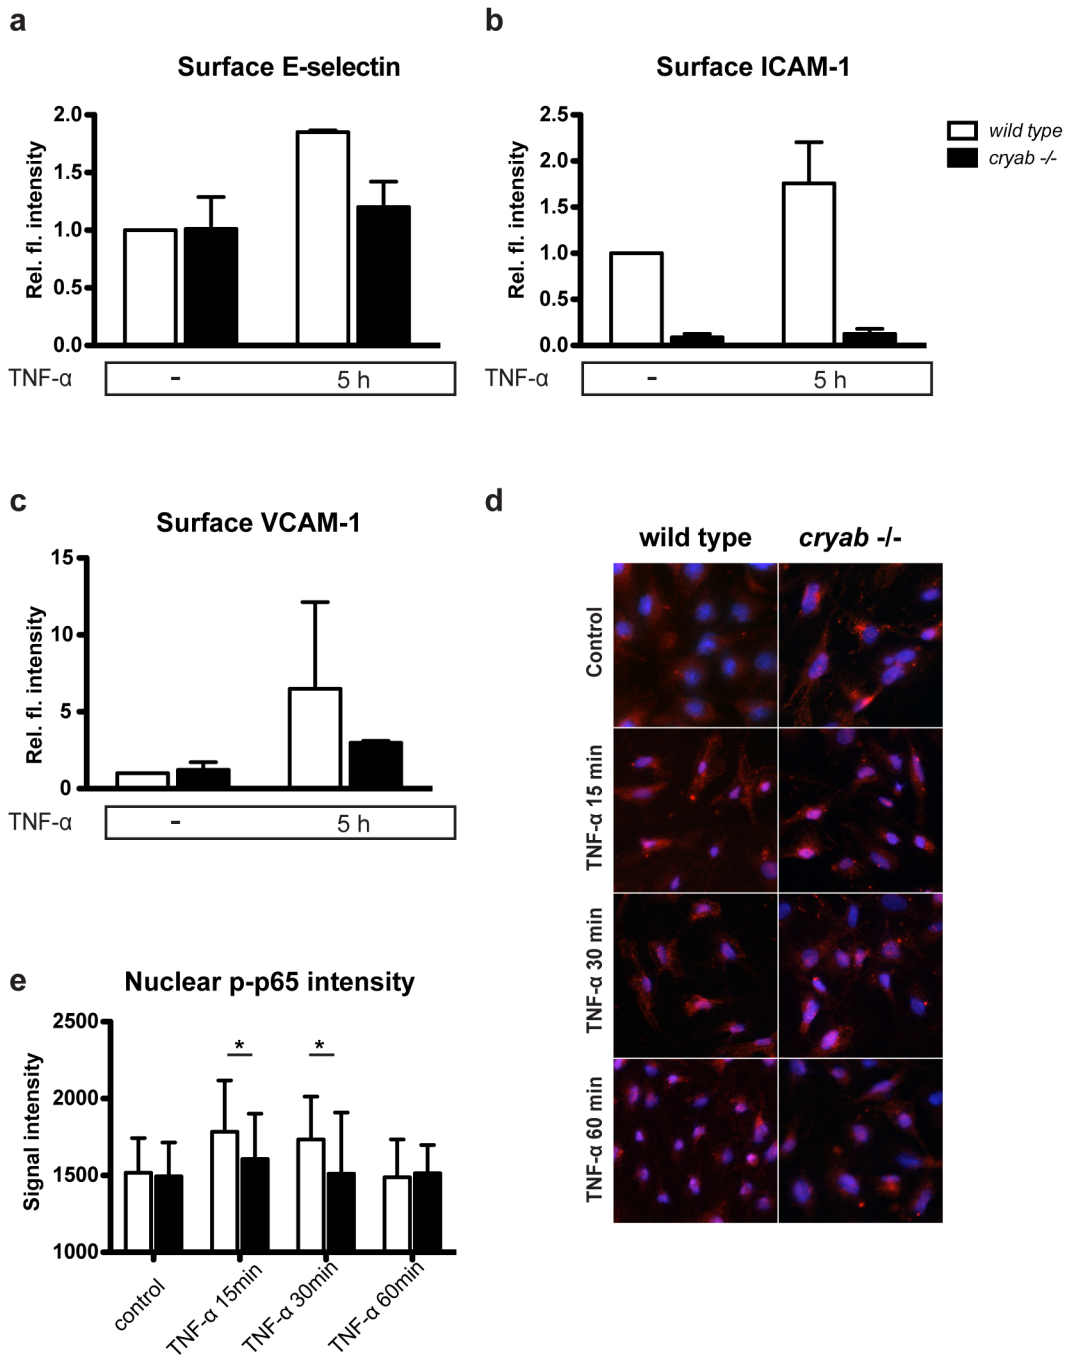

**Fig. S3**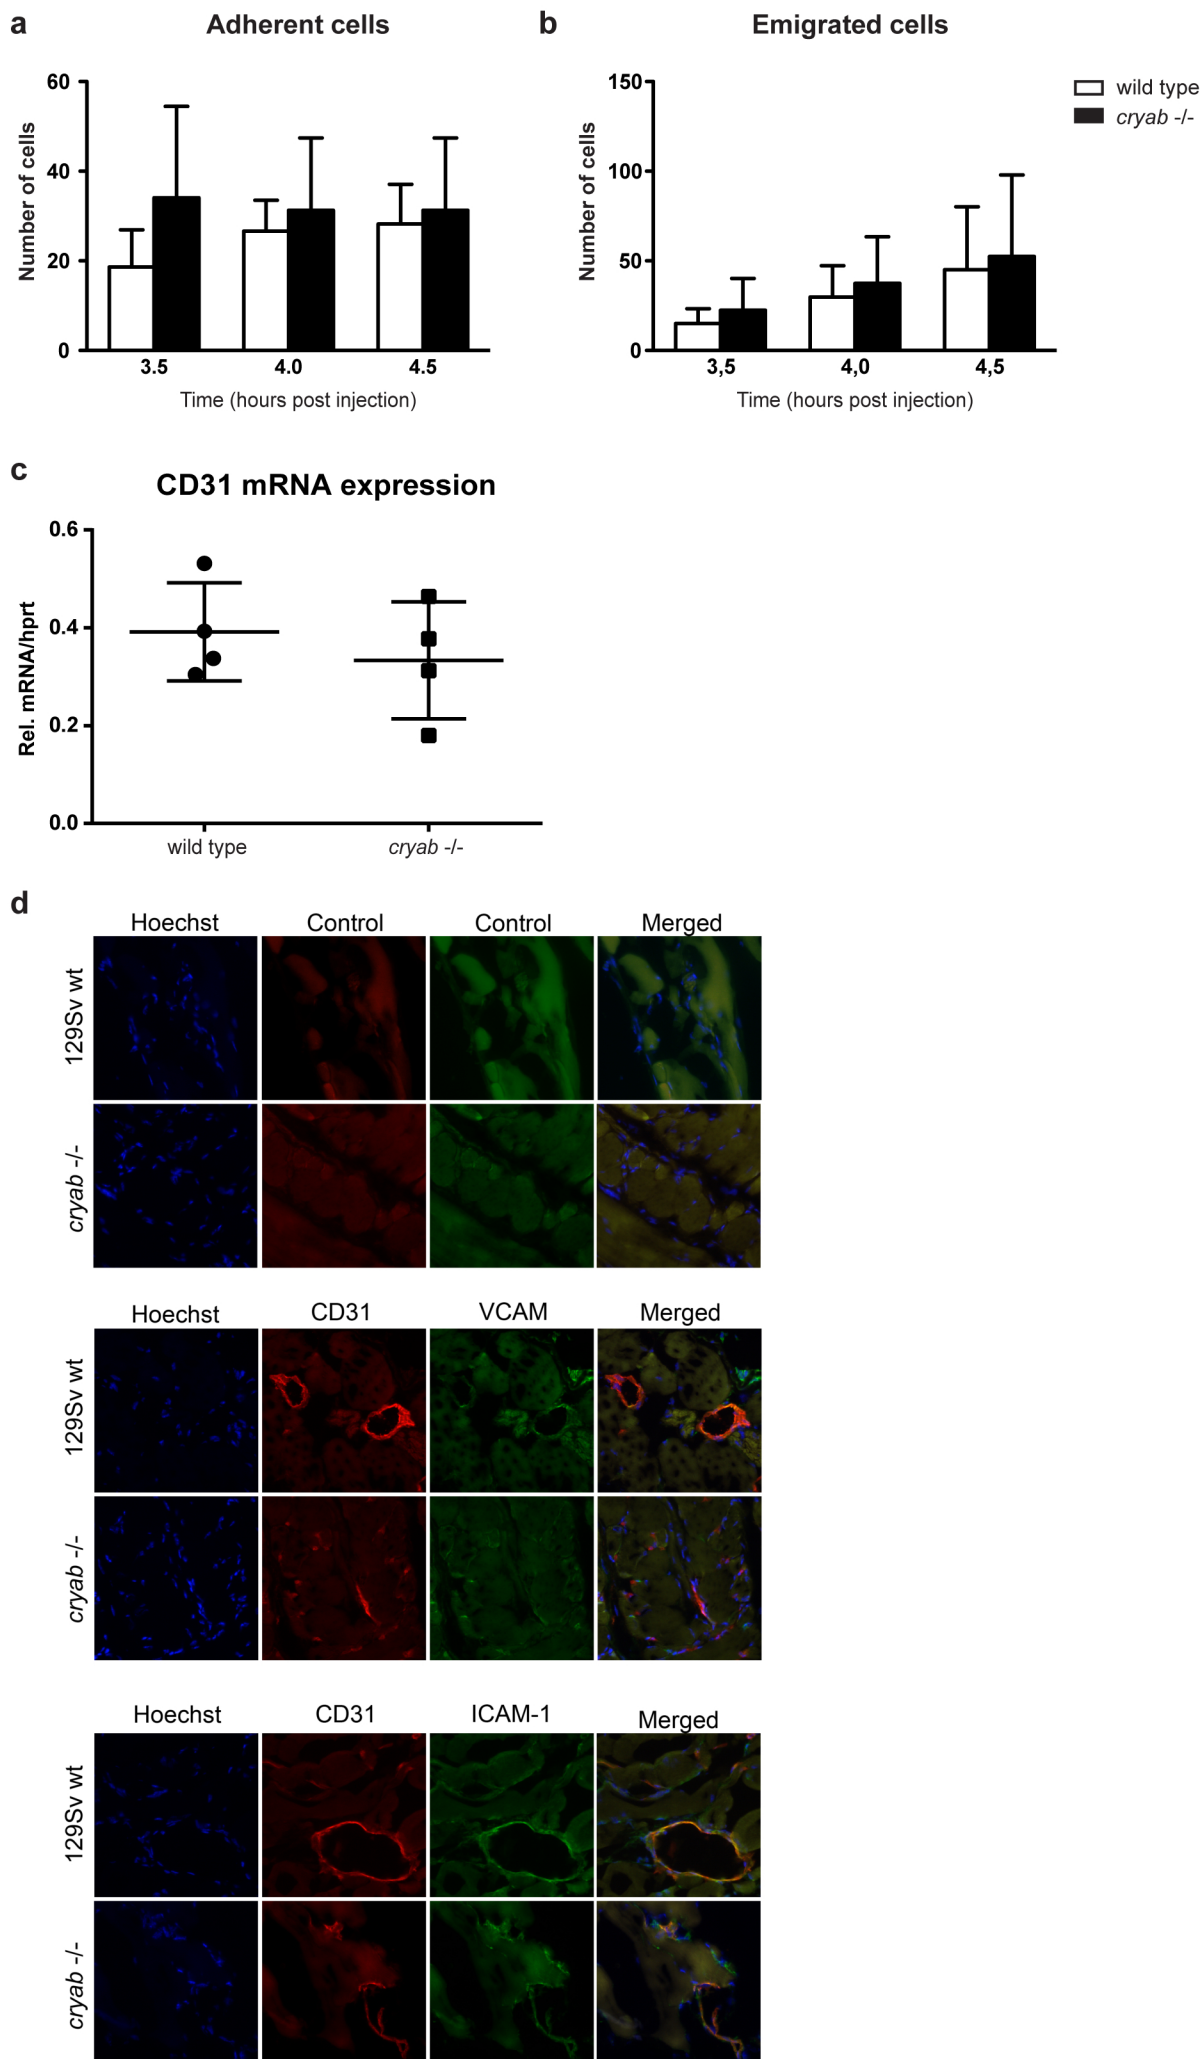

**Supplementary Table 1: qPCR primer sequences**

|                          | Forward primer (5'-3') | Reverse primer (5'-3') |
|--------------------------|------------------------|------------------------|
| <i>mouse hppt</i>        | CAAACCTTTGCTTTCCCTGGT  | TCGAGAGGTCCTTTTCACC    |
| <i>mouse pecam</i>       | TACTGCAGGCATCGGCAAA    | GCATTTTCGCACACCTGGAT   |
| <i>mouse ve-cadherin</i> | AGGACAGCAACTTCACCCTCA  | AACTGCCCATACTTGACCGTG  |
| <i>mouse icam</i>        | CCGCTACCATCACCGTGTA    | CAGAGGTCTCAGCTCCACACT  |
| <i>mouse vcam</i>        | TGGGAAGCTGGAACGAAGTA   | CTCTGGATCCTTGGGGAAA    |
| <i>mouse sele</i>        | GCGCTTTCTCTCTGCTCTTG   | ATGAGCTCACTGGAGGCATT   |
| <i>human hppt</i>        | CTTTGCTGACCTGCTGGATT   | TCCCCTGTTGACTGGTCATT   |
| <i>human cryab</i>       | TGATTGAGGTGCATGGAAAA   | GTGGAACTCCCTGGAGATGA   |
| <i>human icam</i>        | GCCAACCAATGTGCTATTCA   | GTTCCACCCGTTCTGGAGT    |
| <i>human vcam</i>        | CCACAGTAAGGCAGGCTGTA   | TTCTTGCAGCTTTGTGGATG   |
| <i>human sele</i>        | AGTGTGACCCTGGCTTCAGT   | CTTCCATGCTCAGGGGATT    |
